# Supplementary material for: A common neural signature of brain injury in concussion and subconcussion
Source: PubMed Central journal article supplement (PMC6685720; doi:10.1126/sciadv.aau3460), 2019-08-07
Supplement: aau3460_SM.pdf [file aau3460_SM.pdf]

## Supplementary Materials for

### **A common neural signature of brain injury in concussion and subconcussion**

Adnan A. Hiran\*, Jeffrey J. Bazarian, Kian Merchant-Borna, Frank E. Garcea, Sarah Heilbronner, David Paul, Eric B. Hintz, Edwin van Wijngaarden, Giovanni Schifitto, David W. Wright, Tamara R. Espinoza, Bradford Z. Mahon\*

\*Corresponding author. Email: [bmahon@andrew.cmu.edu](mailto:bmahon@andrew.cmu.edu) (B.Z.M.); [adnan\\_hiran@urmc.rochester.edu](mailto:adnan_hiran@urmc.rochester.edu) (A.A.H.)

Published 7 August 2019, *Sci. Adv.* **5**, eaau3460 (2019)  
DOI: 10.1126/sciadv.aau3460

#### **This PDF file includes:**

Fig. S1. Schematic of how FA values were extracted for the CST ROI in the midbrain.

Table S1. Summary statistics for head impact data for the RSHI cohort.

**A. Atlas-defined corticospinal tract**

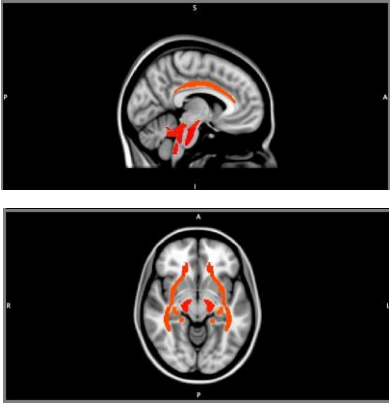

**B. Whole midbrain ROI**

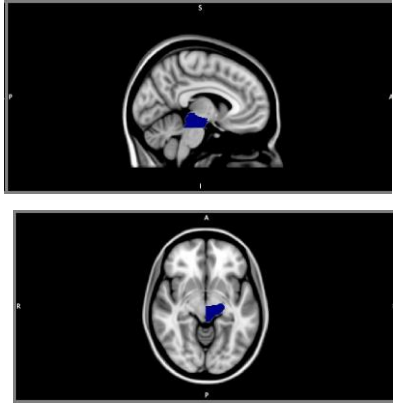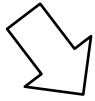

**C. Midbrain corticospinal tract**

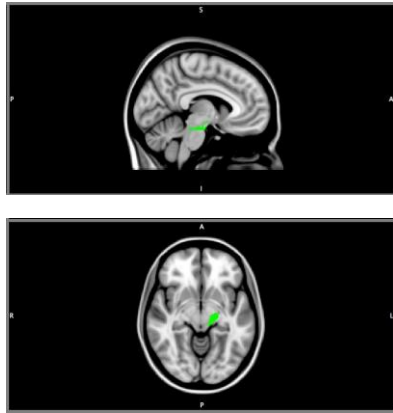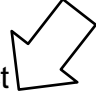

**D. Fractional Anisotropy Map**

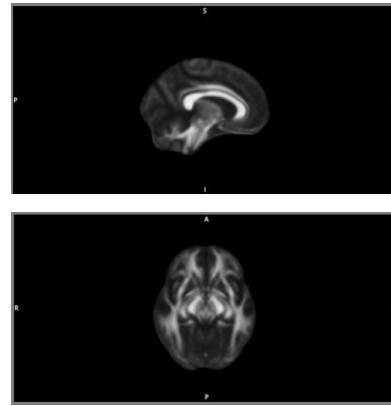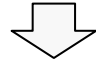

**E. Subject- and ROI-specific Fractional Anisotropy Values**

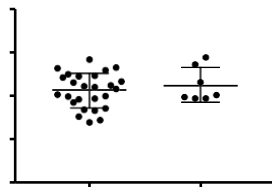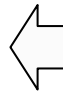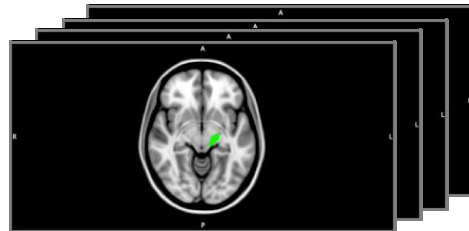

**Fig. S1. Schematic of how FA values were extracted for the CST ROI in the midbrain.** First, the intersection was computed between the atlas defined corticospinal tract (Panel A, colored red) and a midbrain ROI (Panel B, colored blue). The resulting midbrain ROI for the corticospinal tract (Panel C, colored green) was used to extract fractional anisotropy values from each subject's whole-brain global fractional anisotropy map (Panel D), and the results averaged over all voxels in the ROI and plotted (Panel E).

**Table S1. Summary statistics for head impact data for the RSHI cohort.**

| <b>Session</b>     | <b>Rotational Acc<br/>(median)</b> | <b>Rotational Acc<br/>(mean)</b> | <b>Linear Acc<br/>(median)</b> | <b>Linear Acc<br/>(mean)</b> | <b>Numb of<br/>Hits</b> | <b>%Tota<br/>l</b> |
|--------------------|------------------------------------|----------------------------------|--------------------------------|------------------------------|-------------------------|--------------------|
| <b>Competition</b> | 1631.7                             | 1947.5                           | 25.1                           | 31.5                         | 7022                    | 37%                |
| <b>Meeting</b>     | 1463.6                             | 1753.7                           | 23.1                           | 28.5                         | 118                     | 1%                 |
| <b>Practice</b>    | 1578.7                             | 1791.4                           | 24.9                           | 30.1                         | 11334                   | 59%                |
| <b>Scrimmage</b>   | 1526.9                             | 1878.1                           | 24.2                           | 30.6                         | 654                     | 3%                 |
|                    |                                    |                                  |                                |                              | <b>Total:</b>           | 19128              |
